# Supplementary material for: Implementing HPV testing in 9 Latin American countries: The laboratory perspective as observed in the ESTAMPA study
Source: PubMed Central journal article supplement (PMC9714610; doi:10.3389/fmed.2022.1006038), 2022-11-17
Supplement: Data_Sheet_1.pdf [file Data_Sheet_1.pdf]

---

## LIST OF REQUIREMENTS TO IMPLEMENT HPV TESTING FOR ESTAMPA

### 1. LABORATORY FACILITY AND EQUIPMENT:

- a) Basic settings
- b) Equipment for HPV testing: COBAS/HC2
- c) EQA for HPV testing
- d) Refrigerator 4C to store HPV reagents
- e) Freezer -20C to store aliquots
- f) Freezer -70C to store the swabs

### 2. PERSONNEL TO:

- a) Process samples for HPV testing,
- b) Preparation of aliquots of cervical samples
- c) Uploading results in the ESTAMPA database
- d) Person in charge of monitoring and quality control of forms and database

### 3. PROCUREMENT

#### 3.1 SAMPLES COLLECTION SUPPLIES:

- a) PreservCyt:

*In case IARC buys them:*

Import permit of the PreservCyt vials if they are not registered in the country

It is necessary to contact a Transport Company that can deliver the HOLOGIC merchandise; it should be a company authorized to carry dangerous merchandise (The PreservCyt containing methanol) and has experience in the process of customs clearance

*If the group buys locally HOLOGIC the reference needed are: PreservCyt (Ref: 70098-002) Cervex brush (Ref: 70101-001)*

*Recruitment Supplies needed: 2 Vials PC per woman*

- b) Cervex brushes: 2 per woman

#### 3.2 HPV TESTING REAGENTS

- a) Reagents for performing the HPV test
- b) If CH2: Conversion kits (needed to process samples in PreservCyt) and capture kits (Qiagen).

#### 3.3 CONSUMABLES FOR THE PRODUCTION OF ALIQUOTS:

- a) 1.250 mL tips with filter (sterile) for producing aliquots, Dutsher Ref 134000
- b) Cryovials, 2 mL Corning to aliquot cervical samples Ref Corning 430488 (Fisher 10418571)
- c) 1 mL Nunc cryovials to aliquot serum, plasma and White cells, DutsherRef 55001
- d) Cryoboxes cardboard storage + separator 100 positions, Dutsher Ref 39818+ Ref 39824
- e) Sterile gloves

#### 4. DATA ENTRY EQUIPMENT

- a) Computer with internet Access for loading results to the online database ESTAMPA (<https://screening.iarc.fr/scr/estampa/sec>)

#### DOCUMENTATION:

- a) Submission of protocol and Inform consent (IC) to a local scientific ethics committee
- b) Approval of the protocol and the IC by the local scientific Ethics Committee
- c) Research collaboration agreement signed with IARC
- d) Establishment of a local samples transport system (if required)
